# Supplementary material for: Molecular and supramolecular Ni(II) wheels from α-benzoin oxime
Source: Royal Society of Chemistry journal article supplement (doi:10.1039/b902002k), 2009-01-01
Supplement: b902002k.pdf [file b902002k.pdf]

### Crystallographic Data for 1-3.

**(1) Crystal data for  $[\text{Ni}_8(\text{abo})_8(\text{Et}_2\text{O})_2(\text{MeOH})_2(\text{H}_2\text{O})]\cdot 2\text{Et}_2\text{O}$ .**  $\text{C}_{130}\text{H}_{158}\text{N}_8\text{Ni}_8\text{O}_{23}$ ,  $M = 2670.32$ , orthorhombic,  $a = 22.4470(6)$ ,  $b = 55.1580(13)$ ,  $c = 21.2010(5)$  Å,  $\alpha = \beta = \gamma = 90^\circ$ ,  $V = 26249.6(11)$  Å<sup>3</sup>,  $T = 150$  K, space group  $Fdd2$  (no. 43),  $Z = 8$ , 67387 reflections measured, 13364 unique ( $R_{\text{int}} = 0.0565$ ) which were used in all calculations. The final  $R(F_2)$  was 0.0551 (12122 data). Platon squeeze was applied to remove disordered  $\text{Et}_2\text{O}$  solvent molecules (2 per  $\text{Ni}_8$  complex). The disordered ether in the centre of the wheel was treated as two components.

**(2) Crystal data for  $[\text{Ni}_6(\text{abo})_6(\text{aboH}_2)_2(\text{MeOH})_4]\cdot 2\text{Et}_2\text{O}$ .**  $\text{C}_{124}\text{H}_{120}\text{N}_8\text{Ni}_6\text{O}_{22}$ ,  $M = 2426.62$ , triclinic,  $a = 11.6358(4)$ ,  $b = 16.1748(5)$ ,  $c = 17.3392(6)$  Å,  $\alpha = 112.085(2)^\circ$ ,  $\beta = 105.280(2)^\circ$ ,  $\gamma = 101.909(2)^\circ$ ,  $V = 2741.43(18)$  Å<sup>3</sup>,  $T = 150$  K, space group  $P-1$  (no. 2),  $Z = 1$ , 32324 reflections measured, 14737 unique ( $R_{\text{int}} = 0.0590$ ) which were used in all calculations. The final  $R(F_2)$  was 0.0728 (8129 data).

**(3) Crystal data for  $[\text{NaNi}(\text{abo})(\text{aboH})(\text{MeOH})_3]$ .**  $\text{C}_{31}\text{H}_{35}\text{N}_2\text{Na}_1\text{Ni}_1\text{O}_7$ ,  $M = 629.33$ , triclinic,  $a = 13.3416(3)$ ,  $b = 14.8361(3)$ ,  $c = 15.1781(4)$  Å,  $\alpha = 82.101(1)^\circ$ ,  $\beta = 86.408(1)^\circ$ ,  $\gamma = 82.228(1)^\circ$ ,  $V = 2945.50(12)$  Å<sup>3</sup>,  $T = 150$  K, space group  $P-1$  (no. 2),  $Z = 4$ , 38427 reflections measured, 16043 unique ( $R_{\text{int}} = 0.0390$ ) which were used in all calculations. The final  $R(F_2)$  was 0.0474 (11490 data).

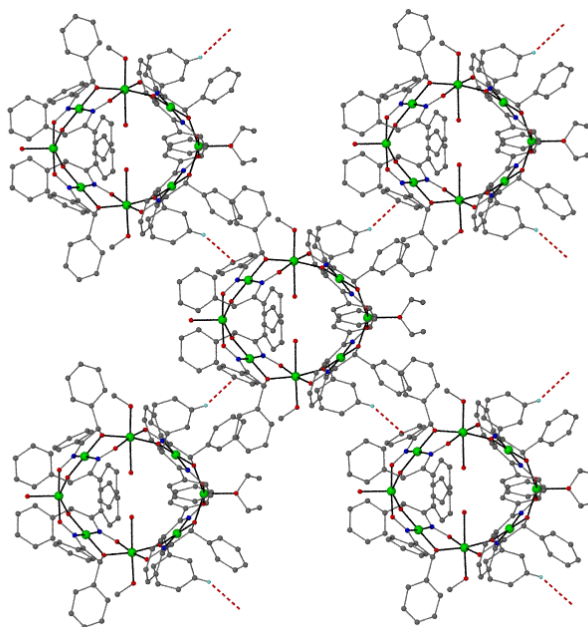

Fig. S1. Part of the (4,4)-grid layer in the  $ac$  plane made of H-bonded  $[\text{Ni}_8]$  wheels. Most hydrogen and carbon atoms have been omitted for clarity.

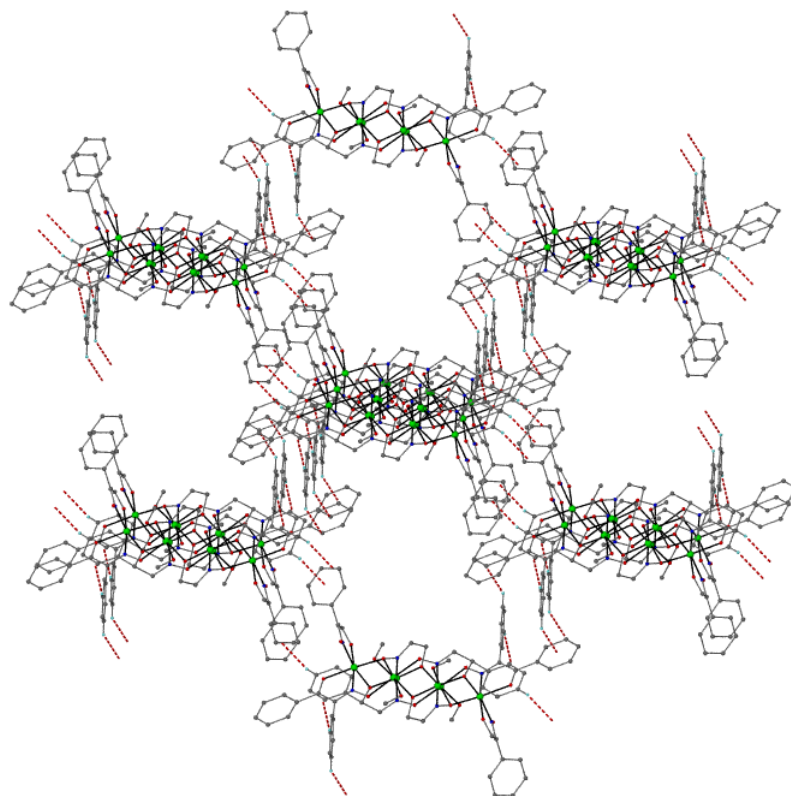

Fig. S2. The **pcu** network made of H-bonded [Ni<sub>6</sub>] wheels. Most hydrogen and carbon atoms have been omitted for clarity.

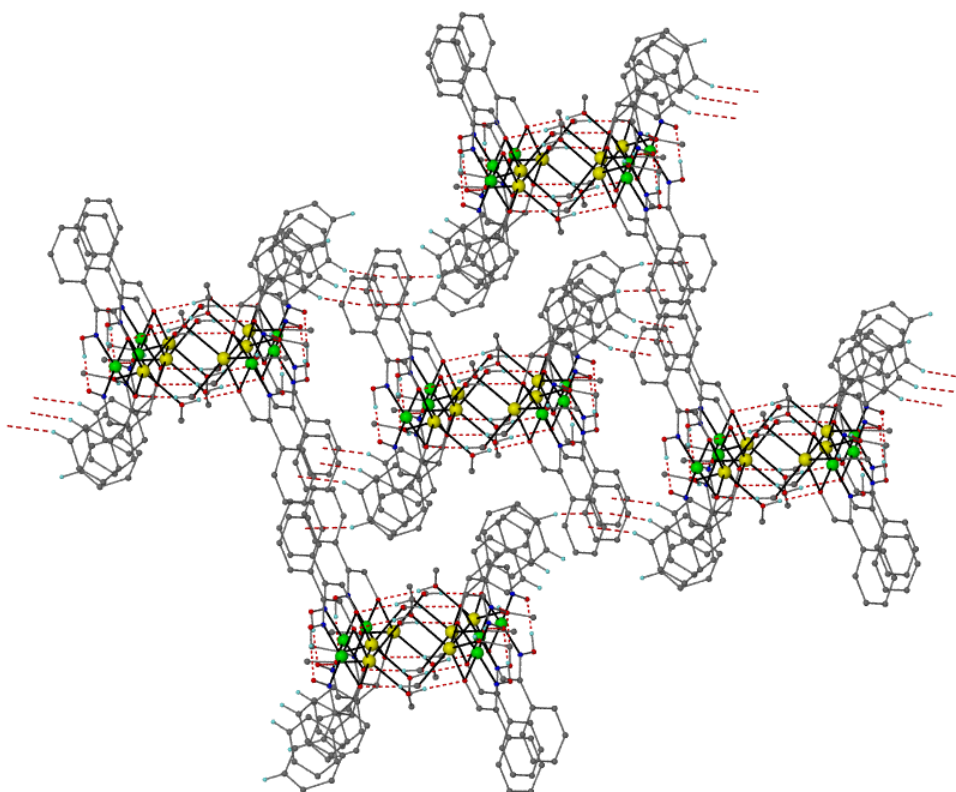

Fig. S3. The **pcu** rod-packing of the H-bonded tapes of (3)<sub>2</sub>. Most hydrogen and carbon atoms have been omitted for clarity
